# Supplementary material
Source: PubMed Central journal article supplement (PMC4406276)

Fig. S5

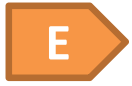

*P. vivax*

*P. cynomolgi*

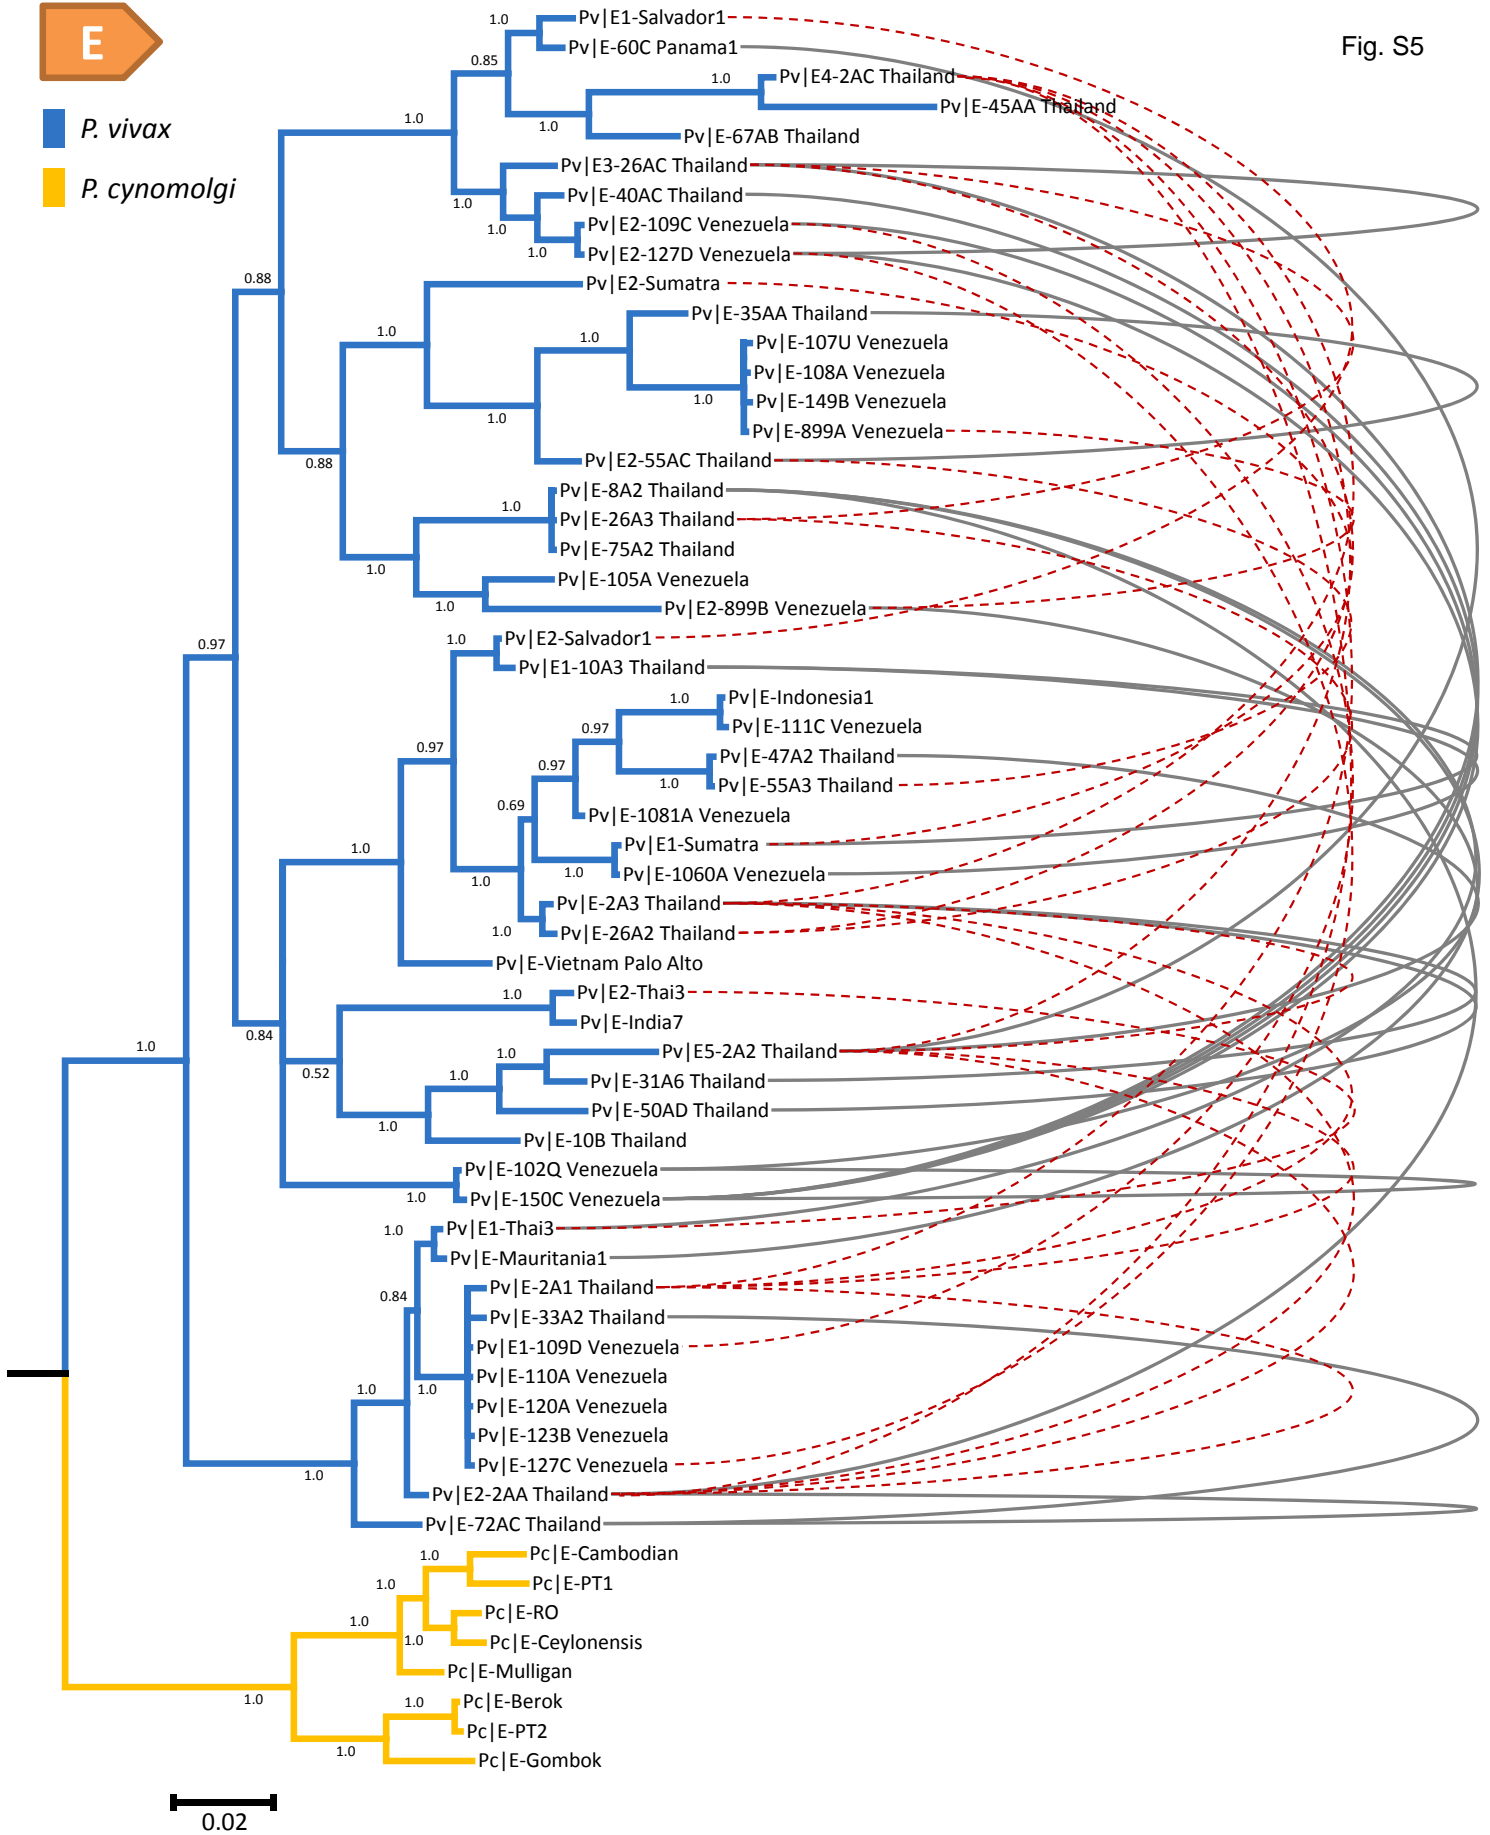

Supplement: NIHMS600485-supplement-08.pdf [file NIHMS600485-supplement-08.pdf]
